# Supplementary material for: PPKs mediate direct signal transfer from phytochrome photoreceptors to transcription factor PIF3
Source: PubMed Central journal article supplement (PMC5437280; doi:10.1038/ncomms15236), 2017-05-11
Supplement: ncomms15236-s1.pdf [file ncomms15236-s1.pdf]

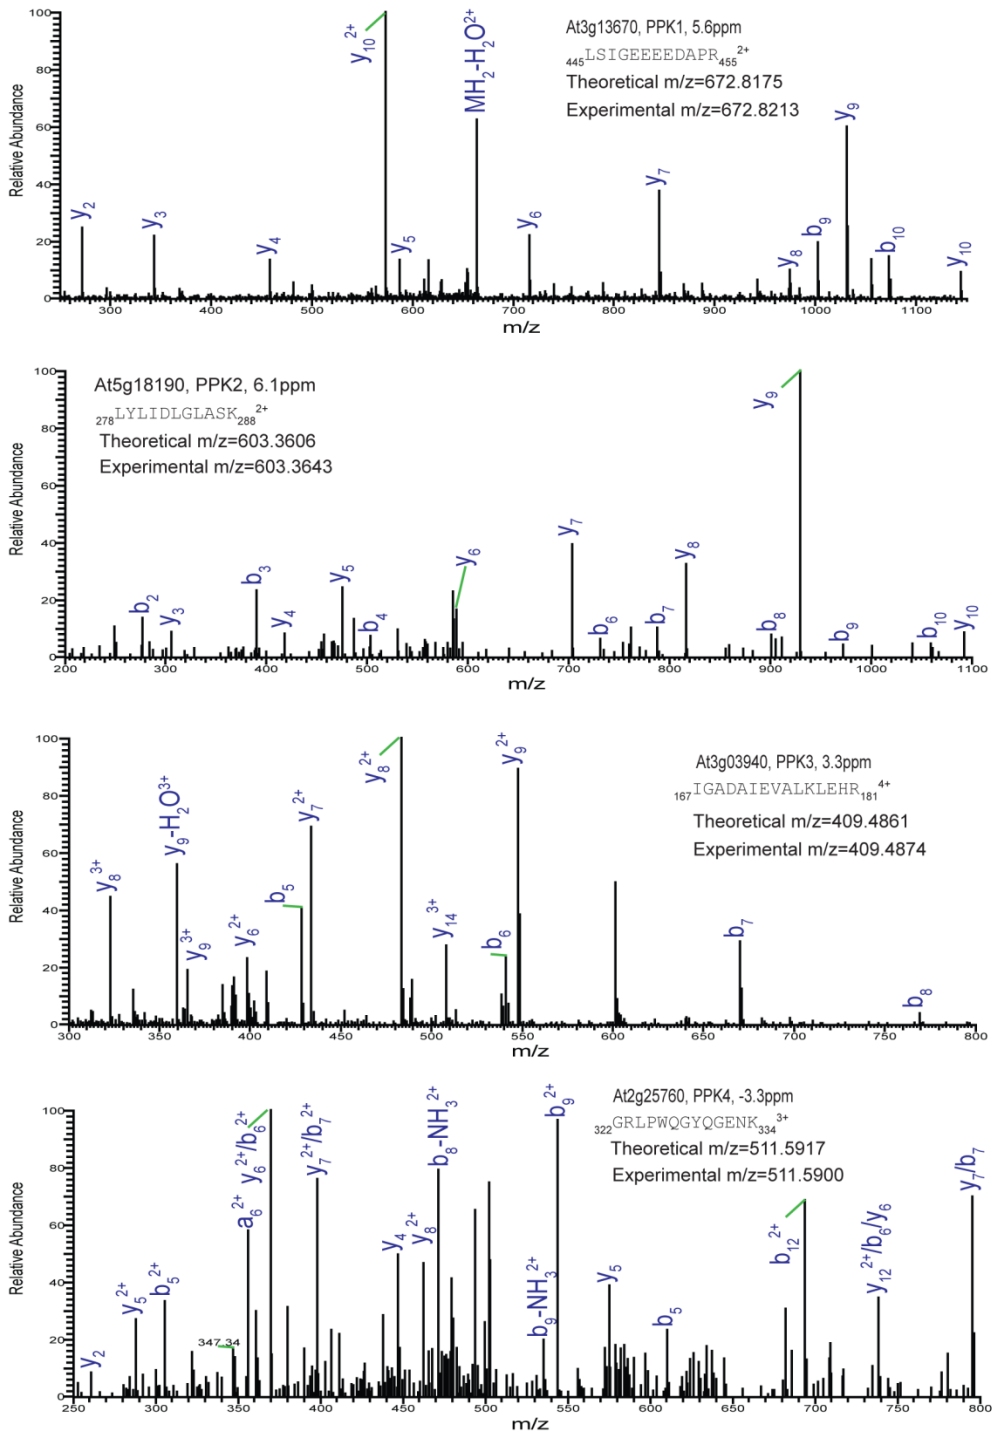

**Supplementary Figure 1 | Collision-induced dissociation (CID) mass spectra of peptides from PPK1, PPK2, PPK3 and PPK4 respectively.**

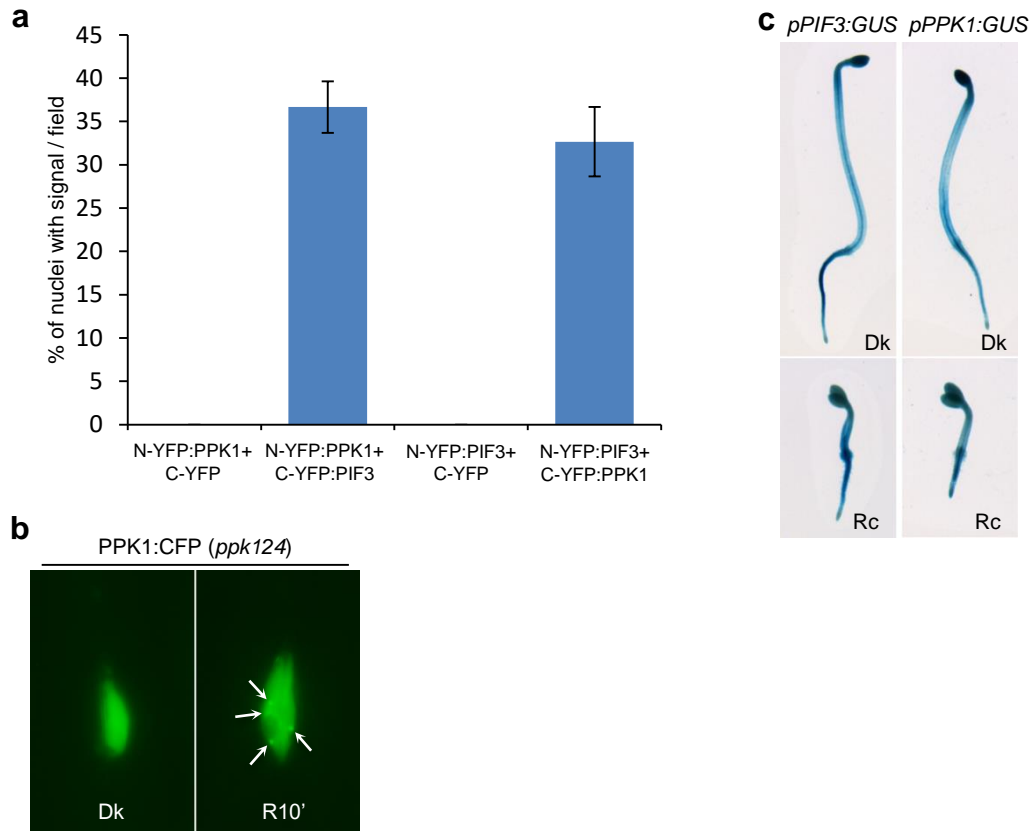

**Supplementary Figure 2 | Intranuclear interaction and overlapping, seedling-wide expression of PPK1 and PIF3.** **a**, PIF3 and PPK1 interact in transient-transfection, Bimolecular Fluorescence Complementation (BiFC) assays. Quantification of BiFC assays in *Nicotiana* leaves as in Figure 1d. Nuclei displaying a split-mVenus YFP fluorescence signal were counted in five microscope fields, at 40X for each construct, and expressed as a percentage of the total number of nuclei visible in that field. Constructs used: N-YFP and C-YFP, N- and C-terminal domains of split mVenus210 fluorescent protein, respectively, fused (or not) to PIF3 or PPK1 proteins, and infiltrated in two reciprocal configurations. Data are shown as mean  $\pm$  SEM. **b**, PPK1 subnuclear localization analysis in the PPK1:CFP (*ppk124*) transgenic line as in Figure 3. Representative epifluorescent images of CFP fluorescence in hypocotyl-cell nuclei are shown. Seedlings were grown for 3 days in the dark, and then either maintained in the dark (Dk), or given a saturating red-light pulse and returned to the darkness for 10 min (R10') before imaging. Arrows indicate apparent light-induced nuclear speckles. **c**, *PPK1* displays a gene expression pattern similar to *PIF3* both in the dark and light. Representative images of histochemical staining of GUS activity in 2-day-old transgenic seedlings grown in the dark (Dk) or continuous red light (Rc). The GUS reporter gene was driven by the *PIF3* (left panels) and *PPK1* (right panels) promoters, respectively.

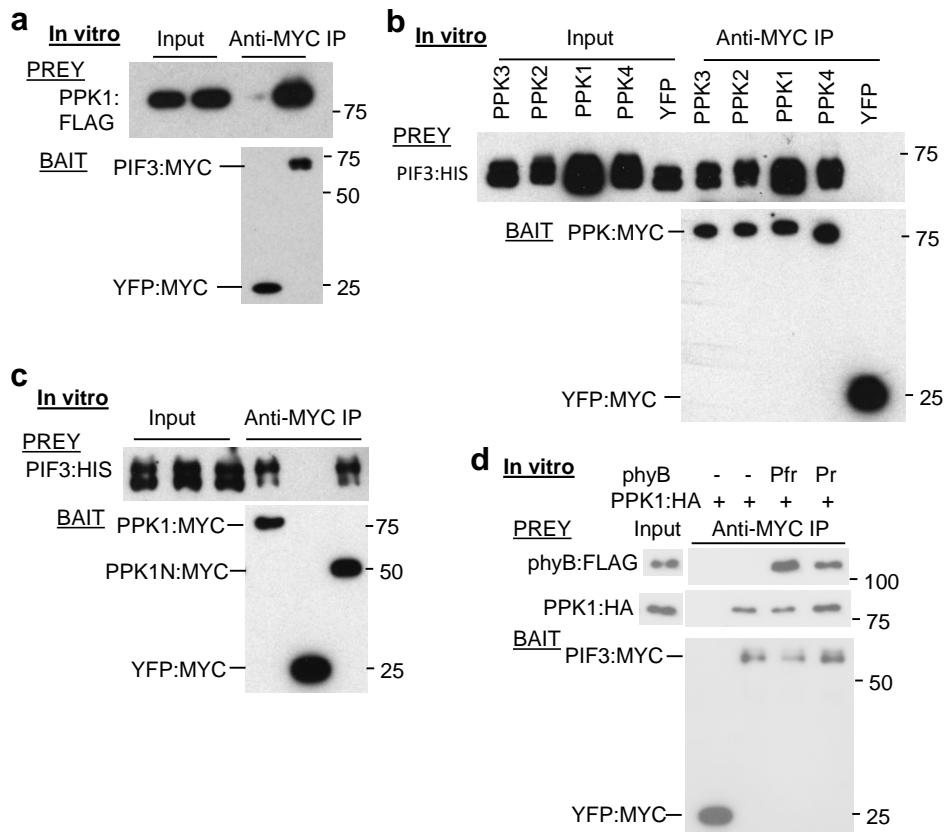

**Supplementary Figure 3 | PIF3 interacts with PPK1, PPK2, PPK3 and PPK4 in vitro.**

**a**, PIF3 interacts with PPK1 in vitro. PPK1:FLAG was co-expressed with PIF3:MYC or YFP:MYC (control) in a HeLa cell lysate, then immunoprecipitated with anti-MYC antibodies. Bait and prey proteins were detected by immunoblot using anti-MYC (bottom) and anti-FLAG antibody (top), respectively. **b**, PIF3 interacts with PPKs in vitro. PIF3:HIS was co-expressed with PPK3-, PPK2-, PPK1 or PPK4-MYC-fusion proteins, then immunoprecipitated with anti-MYC antibodies. Proteins were analyzed by immunoblot using anti-HIS antibody (top panel, Prey) or anti-MYC antibody (bottom panel, Bait). YFP:MYC was used as a negative control. **c**, PIF3 interacts with the N-terminal kinase domain of PPK1 (PPK1N) in vitro as detected by co-IP assay as described in **b**. **d**, phyB, PIF3 and PPK1 form a trimolecular complex in vitro but phyB-Pfr binding does not enhance PPK1 and PIF3 interaction in vitro. In vitro expressed PPK1 and PIF3 were incubated in the absence (-) or presence of phyB (Pfr or Pr conformer), then immunoprecipitated with anti-MYC antibodies. Proteins were analyzed by immunoblot using anti-FLAG antibody (top panel, phyB Prey), anti-HA antibody (middle panel, PPK1 Prey), or anti-MYC antibody (bottom panel, PIF3 Bait). YFP:MYC was used as a negative control.

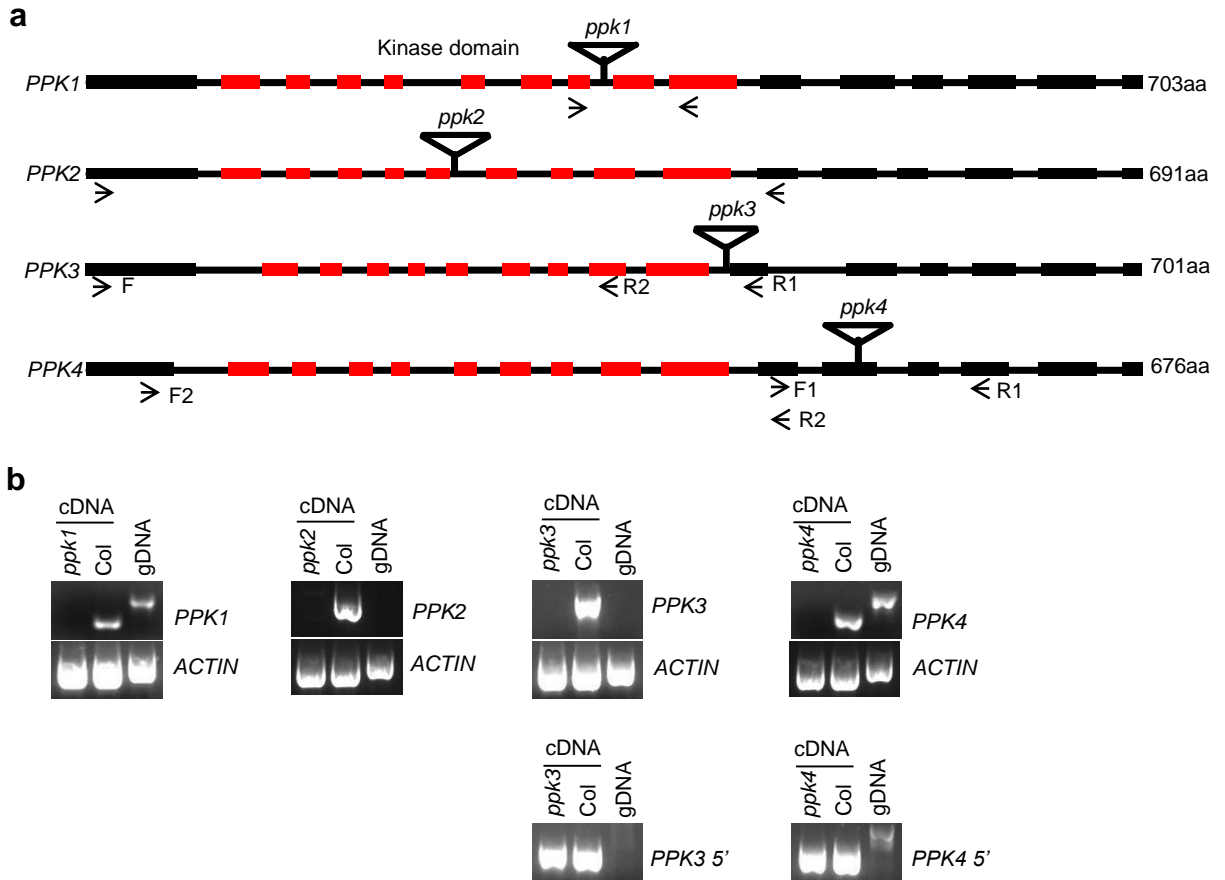

### Supplementary Figure 4 | Characterization of *ppk* mutants.

**a**, Cartoon of *ppk* T-DNA-insertion mutants. Boxes indicate the exons in the four *PPK* genes. Red area represents the kinase domain, triangles indicate the positions of T-DNA insertions, and arrow heads refer to the positions of primers used for RT-PCR analysis in panel (**b**). **b**, RT-PCR analysis of *ppk* mutants. Top, primers specific for the full-length open reading frame corresponding to the gene indicated were used to amplify the respective gene from cDNA derived from the indicated line or from wild-type genomic DNA (gDNA). The *ACTIN* gene was amplified as a control. Bottom, primers specific for a portion of the *PPK3* or *PPK4* gene upstream to the site of the T-DNA insertion, were used to amplify cDNA by RT-PCR for the indicated line. Primer sequences can be found in Supplementary Table 1.

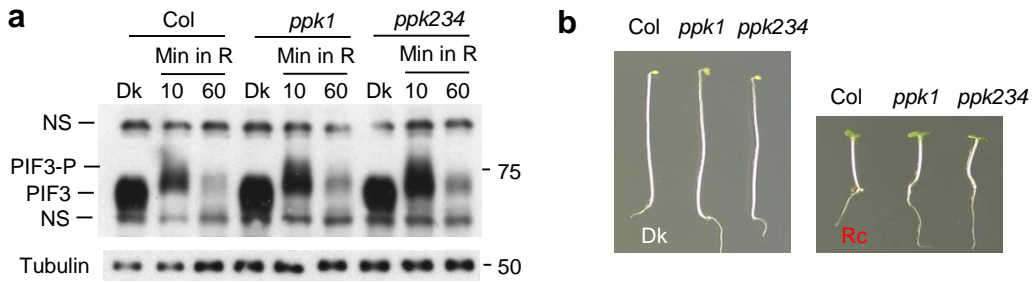

**Supplementary Figure 5 | PPK1, PPK2, PPK3 and PPK4 function collectively in promoting light-induced PIF3 phosphorylation and degradation.**

**a**, Light-induced PIF3 phosphorylation and degradation is normal in the *ppk1* single and *ppk2ppk3ppk4* triple-mutants (*ppk234*). Dark-grown (Dk) seedlings of the indicated genotypes were irradiated with red light for the period indicated before protein extraction and Western blot analysis using anti-PIF3 antibodies. NS: nonspecific bands. PIF3-P, phosphorylated PIF3. **b**, the *ppk1* single and *ppk234* triple-mutant seedlings have normal phenotypes. Seedlings of the indicated genotypes were grown for 4 days in the dark (Dk) or continuous red light (Rc).

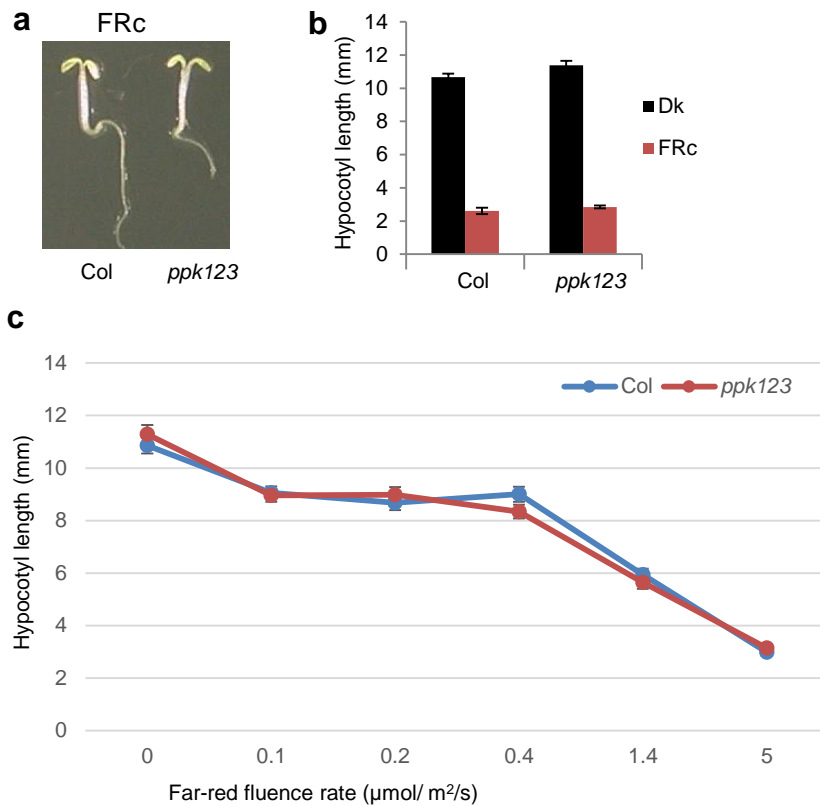

**Supplementary Figure 6 | The *ppk123* triple-mutant responds normally to prolonged, continuous far-red light (FRC).** **a**, The *ppk123* triple-mutant seedlings have phenotypes indistinguishable from WT in FRC, at 3 micromole/ $\text{m}^2/\text{s}^1$ . **b**, The *ppk123* triple-mutant seedlings respond normally to both dark and FRC. Seedlings of the indicated genotypes were grown for 4 days in the dark (Dk) or continuous far-red light (FRC), at 3 micromole/ $\text{m}^2/\text{s}^1$ . Error bars represent SE. **c**, Far-red fluence-rate response curve for hypocotyl elongation in *ppk123* triple-mutant seedlings is normal. Seedlings of the indicated genotypes were grown for 4 days in the dark (Dk) or continuous far-red light (FRC). Error bars represent SE.

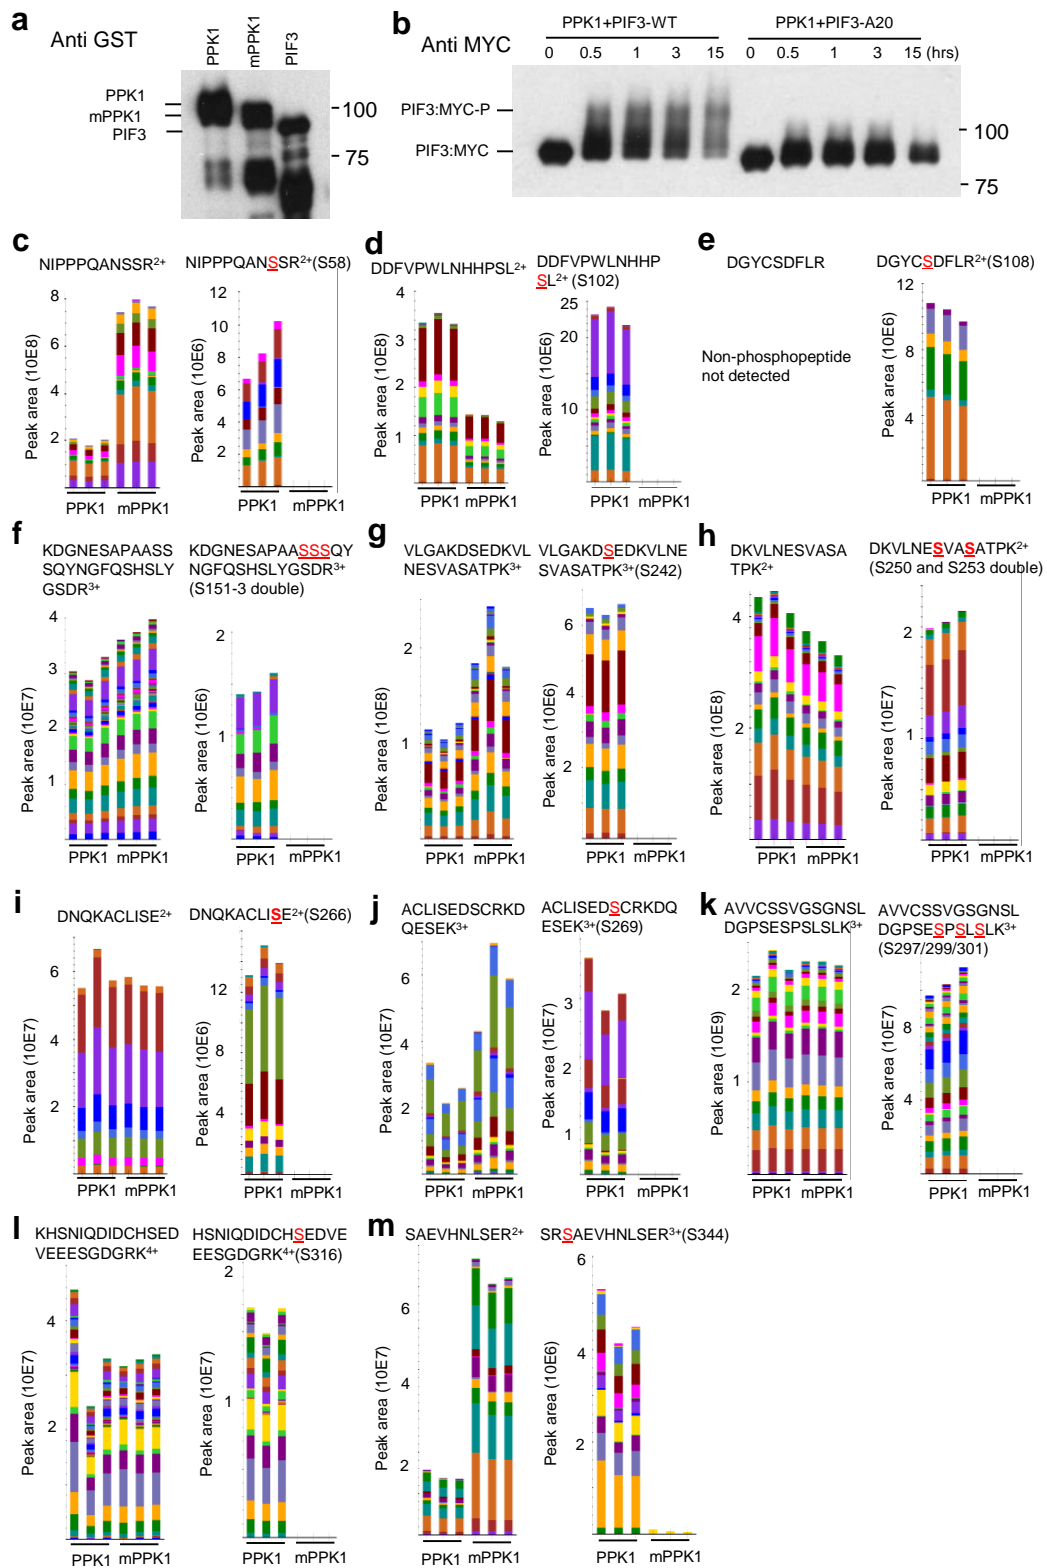

Supplementary Figure 7

**Supplementary Figure 7 | PPK1 alone phosphorylates PIF3 in vitro at previously-identified light-inducible phosphosites.**

**a**, Western blot analysis, using an anti-GST antibody, of N-terminal GST-fusion proteins purified from E.coli for in vitro kinase assays. Top band in each lane represents full-length proteins, lower bands are partially degraded products. **b**, PPK1 induces a strong phosphorylation-related, mobility-shift in wild type, but not phosphosite mutant-variant of PIF3 in vitro. In vitro kinase assays were performed over the time-course indicated using purified GST-fusion proteins from **(a)**. Full-length PIF3 proteins were detected by immunoblot using an antibody against the MYC epitope fused at the C-terminus. A20: phosphosite-dead mutant of PIF3 mutated in the 20 phosphoresidues induced by light in vivo. **c-m**, Mass spectrometric quantification of PIF3 phosphorylation from the in vitro kinase assays with PPK1 or mPPK1 (kinase-dead mutant of PPK1) as in Fig. 4a, using the Parallel Reaction Monitoring (PRM) method. The total integrated fragment ion signal for each peptide containing the light-induced phosphorylation site is plotted as a bar graph. The contribution from each individual fragment ion is displayed as a different color in the bars. Data from three technical repeats of the non-phosphopeptide (left) and phosphopeptide (right) fragments are shown in each panel.



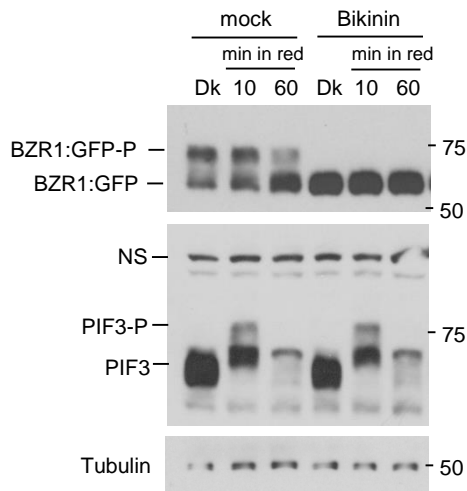

**Supplementary Figure 8 | BIN2 kinase is not required for the light-induced PIF3 phosphorylation and degradation in vivo.**

Three-day-old dark-grown transgenic seedlings expressing a BZR1:GFP transgene were pretreated with the BIN2-kinase inhibitor, Bikinin, or mock for 1 hour before red light treatment for the period indicated. Extracted Proteins were analyzed by immunoblot using anti-GFP antibody (for BZR1, top panel), or anti-PIF3 antibodies (middle panel), or anti-tubulin as a loading control (bottom panel).

**Fig. 1b**

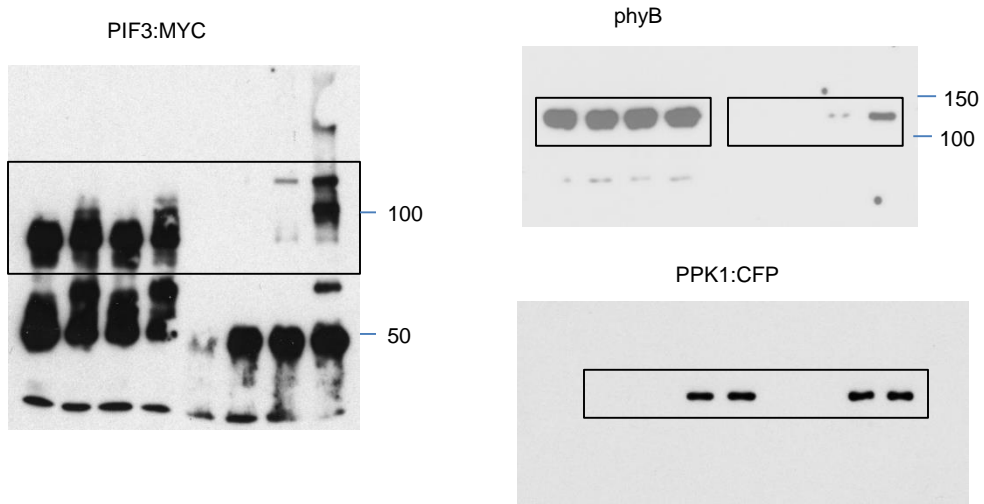

**Fig. 1e**

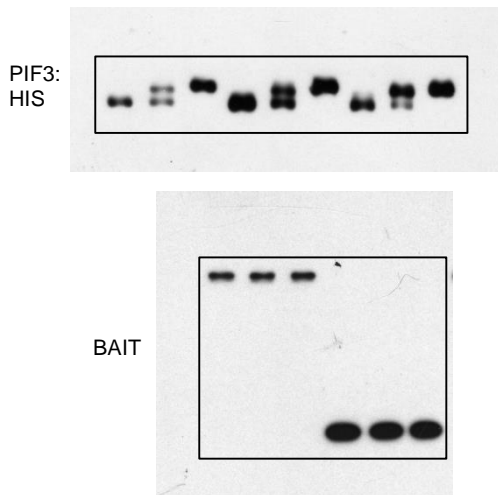

**Fig. 1f**

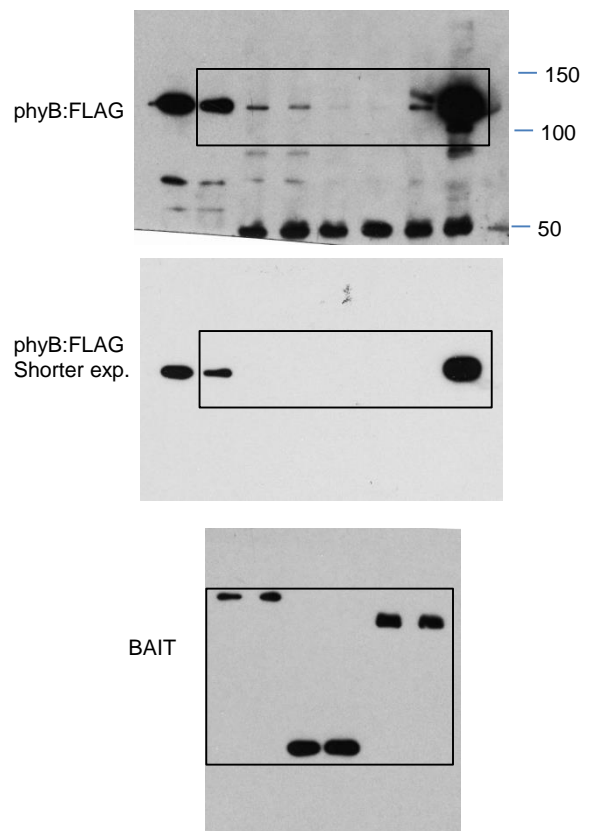

**Fig. 2a**

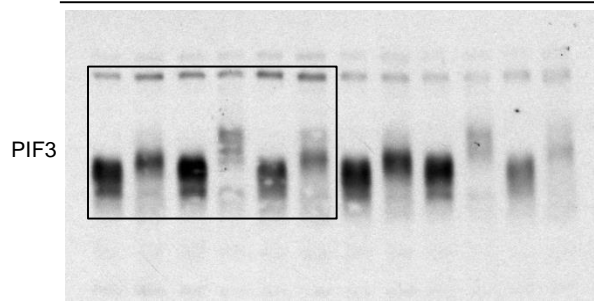

**Fig. 2b**

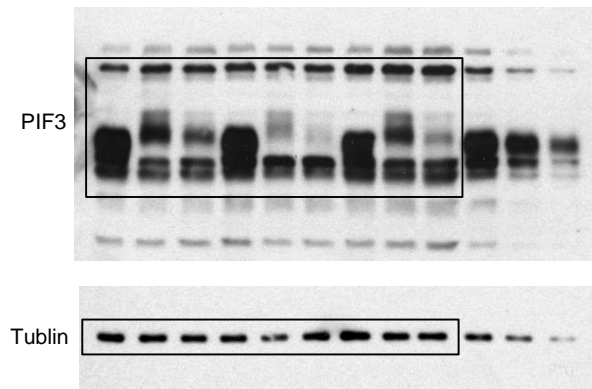

**Fig. 2c**

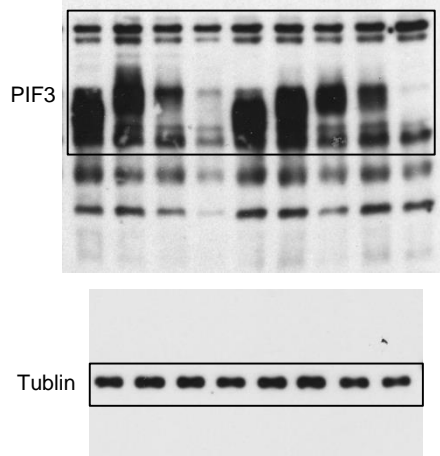

**Fig. 3a**

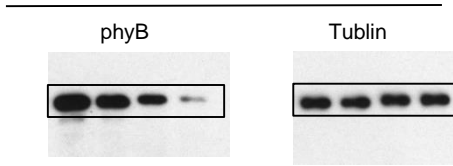

**Third replicate for quantification in Fig. 3a, right-hand panel**

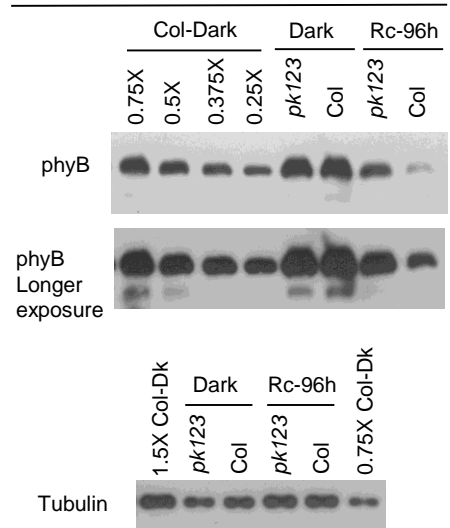

**Fig. 3d**

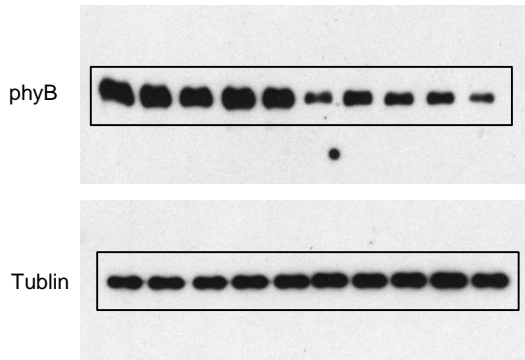

**Fig. 3f**

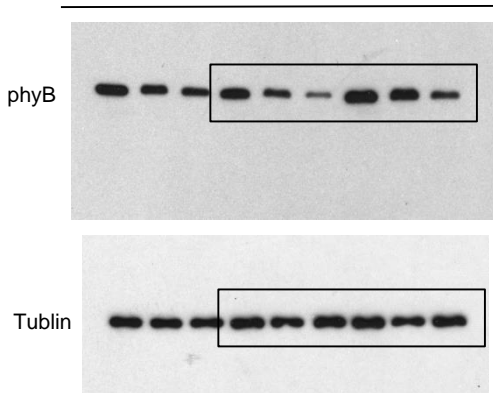

**Supplementary Figure 9 . (continued)**

**Fig. 4a**

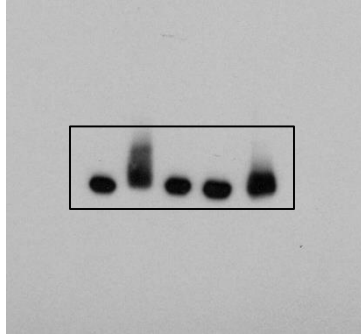

**Fig. 4b**

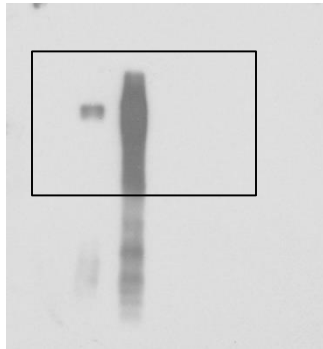

**Supplementary Figure 9 . (continued)**

**Fig 5a**

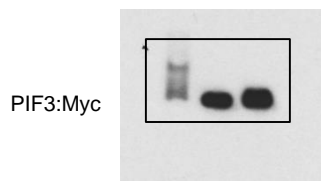

**Fig 5b**

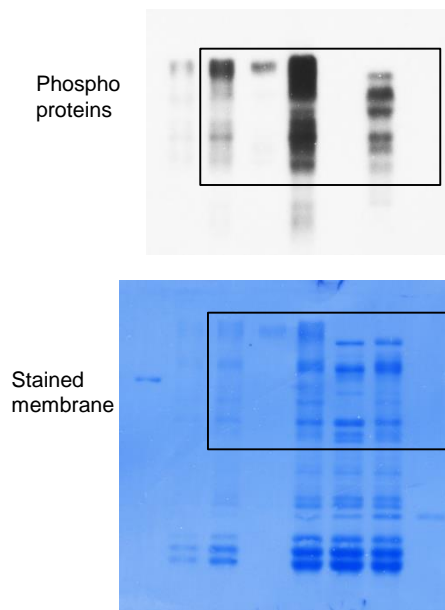

**Fig 5c**

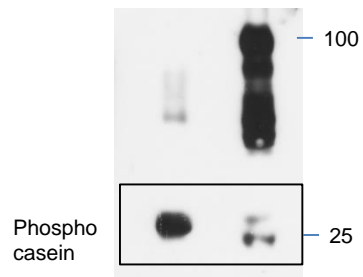

**Supplementary Figure 9 . (continued)**

**Fig. 6a**

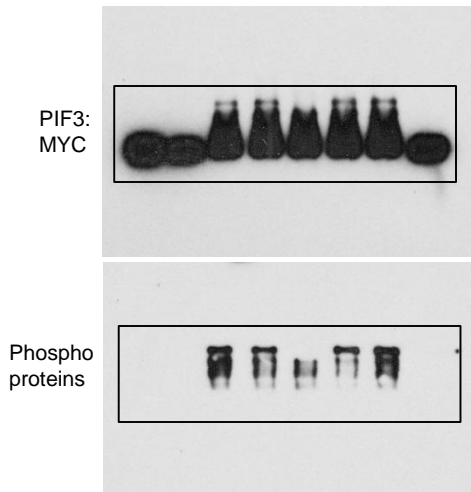

**Fig. 6b**

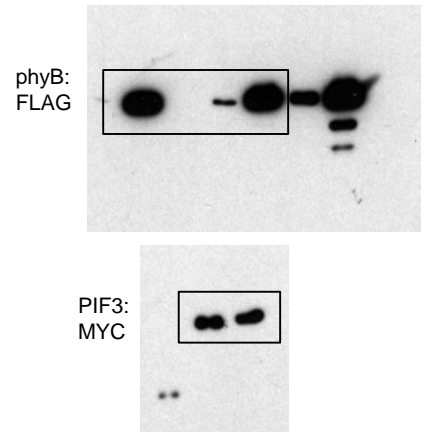

**Fig. 6c**

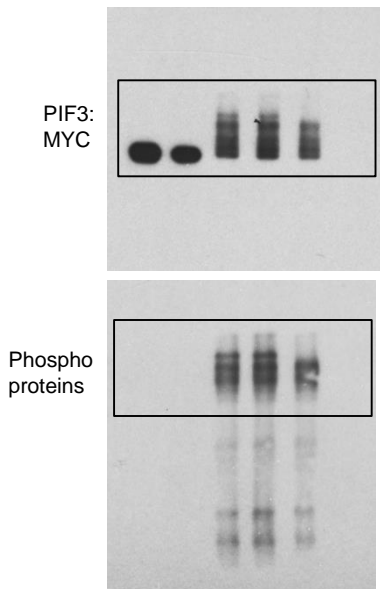

**Fig. 6d**

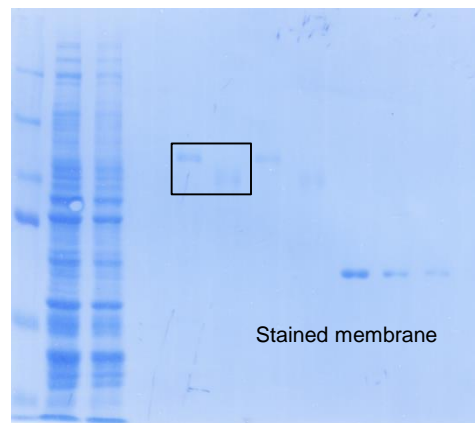

**Fig. 6e**

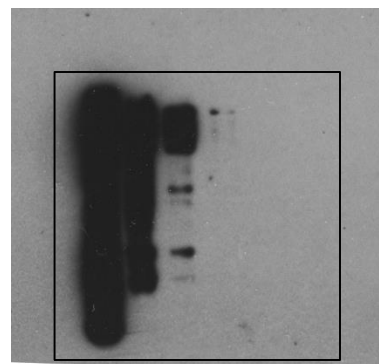

**Supplementary Table 1 | Primer sequences**

| Primer name           | Primer sequence                                       |
|-----------------------|-------------------------------------------------------|
| Genotyping            |                                                       |
| PPK3gF                | TCCTCGAGGCAGTTACGAAT                                  |
| PPK3gR                | GCCAAAATAAATGCAAAGCC                                  |
| PPK3-F4               | TCATGCATTGTTTCATCCCT                                  |
| LBa1                  | TGGTTCACGTAGTGGGCCATCG                                |
| PPK2-F3               | GCAAAGGATGCAATTTTGGT                                  |
| PPK2-R2               | GCCAAGAAAATGCAAATGGT                                  |
| PPK2-F1               | atgccagagtaagaagtggagc                                |
| PPK1-F4               | TTCAGTTATGTGCATGGGGA                                  |
| PPK1-R4               | ATGTCACCTTTTGAGCACCC                                  |
| PPK1 T-DNA            | ATATTGACCATCATACTCATTGC                               |
| PPK4-F2               | TCCTGGCAACTTTCCTTGTC                                  |
| PPK4-R2:              | AACCACGAATGAGTTCCCAC                                  |
| RT-PCR                |                                                       |
| PPK3RT-F              | GATCGAGACGCCTTGACGAGC                                 |
| PPK3RT-R1             | TAGACTGAAATCCACTGTGTG                                 |
| PPK3RT-R2             | ACGACCAAGATGTGCATGGCA                                 |
| PPK2RT-F              | AACCTAGCCCTCAGGTGAC                                   |
| PPK2RT-R              | AGACTGAGATCCACTGACAA                                  |
| PPK1RT-F              | AGTGGAGAGAAGGTGGTAGCGGAC                              |
| PPK1RT-R              | GCGATGTTGCCATCTTCTTTTGC                               |
| PPK4RT-F1             | TGGATCAGCATTACAGTGCTCACAGAC                           |
| PPK4RT-R1             | TCCACTTGAAGGGAAAAGAATCACTGAC                          |
| PPK4RT-F2             | CTGATGATGAAGGAAACGCTCC                                |
| PPK4RT-R2             | GTCTGTGAGCACTGTAAATGCTG                               |
| Actin2RT-F            | GTTGGGATGAACCAGAAGGA                                  |
| Actin2RT-R            | GAACCACCGATCCAGACACT                                  |
| Promoter GUS          |                                                       |
| PPK1-Pr-F4            | ATGTCGAGGCTCGCACCAAG                                  |
| PPK1-Pr-R:            | AGCTCAAACCCCATGCAATCG                                 |
| Pull down             |                                                       |
| NdeI-PPK1F            | catatgATGCCGGAGC TTCGCCGTGG                           |
| Sall-PPK1R            | gtcgacAGATACAGTTCGGCCATAGC                            |
| Sall-HA-PPK1-R        | gtcgacGGCGTAGTCGGGCACGTCGTAGGGGTAAGATACAGTTCGGCCATAGC |
| SalPPK1N-R            | gtcgacTTCGCCAAGAGGTCTTGA                              |
| NdeI-PPK3F            | TGGCCACCACCCATATGCCAGAGT TAAGAAGTGG                   |
| Sall-PPK3R            | GTGCGGCCGCGTCGACGCAAAGTGTCCGACCATAGC                  |
| Sall-PPK2R            | GTGCGGCCGCGTCGAC GCAAAGTGTCCCTCCCAAAGC                |
| NdeI-PPK4F            | TGGCCACCACCCATATGCCTGAGCTGCGTAGCAA                    |
| Sall-PPK4R            | GTGCGGCCGCGTCGAC TGACACAGTTCGACCATAAC                 |
| In vitro kinase assay |                                                       |
| PPK1-D267N            | ggttatgtgcatgggaatgtaagccagaa                         |
| BiFC                  |                                                       |
| AscI-PIF3             | TTggcgcgccATGCCCTCTGTTTGGAGCTTTTC                     |
| PIF3-AvrII            | AGAcctaggccCGACGATCCACAAAAGTATC                       |
| AscI-PPK1             | TTggcgcgccATGCCGGAGCTTCGCCGTGG                        |
| PPK1-SpeI             | GGactagtAGATACAGTTCGGCCATAGC                          |
| SanDI-PIF3            | GCATGgggtccCCTCTGTTTGGAGCTTTTCAG                      |
| PIF3-BspEI            | TGTGtccggaCGACGATCCACAAAAGTATCA                       |
| SanDI-PPK1            | GCATGgggtccCCGGAGCTTCGCCGTGGAG                        |
| PPK1-BspEI            | TGTGtccggaAGATACAGTTCGGCCATAGC                        |
